# Supplementary material
Source: Elsevier journal article supplement (https://comptes-rendus.academie-sciences.fr/geoscience/article/10.1016/j.crte.2016.06.001/file/attach/mmc1.pdf)
Supplement: mmc1 [file mmc1.pdf]

Table 1: Classification and general characteristics of Beni Bousera pyroxenites

| Classification | Rock types                     | Mineralogical compositions                          | Microstructures                                                        | Distribution                             |                                                         |
|----------------|--------------------------------|-----------------------------------------------------|------------------------------------------------------------------------|------------------------------------------|---------------------------------------------------------|
| Group I        | Ia                             | Corundum-garnet clinopyroxenites                    | 35-45% Cpx, 20-30% Grt, 15-20% Co, < 5% Plg, < 5% Sp, ≤ 1% Saph        | Dominantly granuloblastic                | Grt-Sp mylonite domain                                  |
|                | Ib, Ic                         | Garnet-spinel & garnet-plagioclase clinopyroxenites | 20-65% Grt, 20-40% Cpx, 10-15% Opx, 5-10% Sp and/or Plg, 0-3% Ol       | Porphyroclastic, variably recrystallized | Grt-Sp mylonite domain                                  |
| Group II       | IIa                            | Graphite-garnet websterites                         | 40-45% Opx, 35-40% Cpx, 10-15% Gph, 5-10% Grt                          |                                          | Transition between Grt-Sp mylonite and Ariegite domains |
|                | IIb                            | Garnet clinopyroxenites                             | 40-55% Cpx, 15-25% Grt, 5-20% Opx, 1-5% Phl                            |                                          | Grt-Sp mylonite & Ariegite domains                      |
|                | IIc                            | Garnet-spinel websterites                           | 40-50% Opx, 35-40% Cpx, 5-15% Grt, 5-10% Ol, 2-5% Sp, 1-3% Am, 3-5% Ke | Coarse porphyroclastic                   | Ariegite-Seiland domain                                 |
| Group III      | Olivine-spinel websterites     | 40-50% Opx, 5-40% Ol, 5-20% Cpx, 5-15% Sp           |                                                                        | Seiland domain                           |                                                         |
| Group IV       | Cr-diopside spinel websterites | 55-75% Opx, 15-35% Cpx, 5-10% Sp, <3% Ol, <3% Phl   | Coarse granular to porphyroclastic                                     | Seiland domain                           |                                                         |
